# Supplementary material for: Imaging diagnosis of a giant choledochal cyst in an infant
Source: PubMed Central journal article supplement — Radiol Case Rep. 2021 Dec 4;17(2):404–11. doi: 10.1016/j.radcr.2021.10.051 (PMC8649116; doi:10.1016/j.radcr.2021.10.051), 2021-12-04
Supplement: mmc1.pdf [file mmc1.pdf]

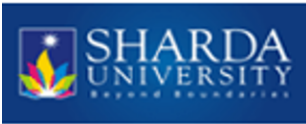

Dr. Shabnam B Grover (SUSMR Professor) <shabnam.grover@sharda.ac.in>

---

## FW: AJR Permission Granted

1 message

---

**Susanne Kahler** <skahler@arrs.org>

Fri, Oct 8, 2021 at 6:10 PM

To: "shabnamgrover@yahoo.com" <shabnamgrover@yahoo.com>

Cc: "saurabh.pandey@sharda.ac.in" <saurabh.pandey@sharda.ac.in>, "sonali.malhotra@sharda.ac.in"

<sonali.malhotra@sharda.ac.in>, "shabnam.grover@sharda.ac.in" <shabnam.grover@sharda.ac.in>

Dear Dr. Grover:

Payment was processed and permission was sent to you on September 27, 2021. I have included it again below.

Sincerely,

Susanne

Susanne Kahler

*Peer Review Administrator*

### **ARRS**

[44211 Slatestone Court](#)

[Leesburg, VA 20176-5109](#)

703-858-4339

703-729-4839 FAX

[www.arrs.org](http://www.arrs.org)

### **2022 ARRS Annual Meeting**

*New Orleans | Virtual | On Demand*

**Save the Dates—May 1–5**

---

**From:** [permissionsAJR@e.arrs.org](mailto:permissionsAJR@e.arrs.org) <[permissionsAJR@e.arrs.org](mailto:permissionsAJR@e.arrs.org)>

**Sent:** Monday, September 27, 2021 10:55 PM

**To:** [shabnamgrover@yahoo.com](mailto:shabnamgrover@yahoo.com)

**Subject:** AJR Permission Granted

## American Roentgen Ray Society

Shabnam Bhandari Grover

Date 9/22/2021

Department of Radiology, SMS& R, Sharda Hospital, Sharda University, Greater Noida, UP  
 Department of Radiology, SMS& R, Sharda Hospital, Sharda University, Greater Noida, UP  
 E-81, Kalkaji, New Delhi, 110019, India.  
 Greater Noida Uttar Pradesh 201310  
 India

Thank you for your request for permission to reproduce the following material from the *American Journal of Roentgenology*.

|          |                                                             |                              |   |
|----------|-------------------------------------------------------------|------------------------------|---|
| AJR      | Inês Santiago, Rui Loureiro, Luis Curvo-Semedo, Cristina    | Congenital Cystic Lesions of |   |
| 2012;198 | Marques, Francisco Tardáguila, Celso Matos, Filipe Caseiro- | the Biliary Tree             | 1 |
| none     | Alves                                                       |                              |   |

Figure: 9 only

For: Imaging diagnosis of a giant  
 Choledochal Cyst in an infant

**Balance: \$0.00**

### Permission to use

The following conditions apply:

1. Use of the following credit line: [Reprinted/Modified/Adapted] from [title of article, author, the American Journal of Roentgenology title and volume/issue, Copyright© [year], copyright owner as specified in the American Journal of Roentgenology].
2. One-time, non-exclusive use only to include on-line versions and/or CD-ROMS. This permission does not include revisions of future editions.
3. Translations of copyrighted text is prohibited.
4. The use of the licensed materials is not in any way an endorsement and must not imply an endorsement.

We regret that ARRS cannot supply original or digital material for reproduction.

American Roentgen Ray Society

Date 9/27/2021

**44211 Slatestone Court Leesburg, VA 20176-5109**  
**(866) 940-2777 – From U.S. & Canada**

**(703) 729-3353 – Outside U.S. & Canada**
